# Supplementary material for: ZEB1-mediated biogenesis of circNIPBL sustains the metastasis of bladder cancer via Wnt/β-catenin pathway
Source: PubMed Central journal article supplement (PMC10394821; doi:10.1186/s13046-023-02757-3), 2023-08-02
Supplement: 13046_2023_2757_MOESM1_ESM.pdf [file 13046_2023_2757_MOESM1_ESM.pdf]

This document certifies that the manuscript

## **ZEB1 mediated circNIPBL biogenesis sustains bladder cancer metastasis via a miR-16-2-3p/Wnt5a Positive Feedback Loop**

prepared by the authors

**Yuanlong Li<sup>1,2#</sup>, Yao Kong<sup>3#</sup>, Mingjie An<sup>1,2#</sup>, Yuming Luo<sup>3</sup>, Hanhao Zheng<sup>1,2</sup>, Yan Lin<sup>1,2</sup>, Jiancheng Chen<sup>1,2</sup>, Jin Yang<sup>4</sup>, Libo Liu<sup>1,2</sup>, Baoming Luo<sup>5</sup>, Jian Huang<sup>1,2\*</sup>, Tianxin Lin<sup>1,2\*</sup>, Changhao Chen<sup>1,2\*</sup>**

was edited for proper English language, grammar, punctuation, spelling, and overall style by one or more of the highly qualified native English speaking editors at AJE.

This certificate was issued on **April 3, 2023** and may be verified on the [AJE website](#) using the verification code **4E5E-7DEB-AA1D-7BF3-ACAP**.

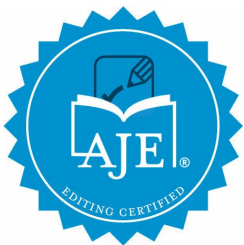

Neither the research content nor the authors' intentions were altered in any way during the editing process. Documents receiving this certification should be English-ready for publication; however, the author has the ability to accept or reject our suggestions and changes. To verify the final AJE edited version, please visit our verification page at [aje.com/certificate](#). If you have any questions or concerns about this edited document, please contact AJE at [support@aje.com](mailto:support@aje.com).
